# Supplementary material for: A flower-like ZnO–Ag2O nanocomposite for label and mediator free direct sensing of dinitrotoluene
Source: Royal Society of Chemistry journal article supplement (doi:10.1039/d0ra02826f), 2020-01-01
Supplement: d0ra02826f1.pdf [file d0ra02826f1.pdf]

## Supplementary Information

### Flower-like ZnO-Ag<sub>2</sub>O nanocomposite for label and mediator free direct sensing of dinitrotoluene

Urmila Chakraborty<sup>a</sup>, Gaurav Bhanjana<sup>a</sup>, Jost Adam<sup>b</sup>, Yogendra Kumar Mishra<sup>b</sup>, Gurpreet Kaur<sup>a\*</sup>, Ganga Ram Chaudhary<sup>a,c\*</sup>, Ajeet Kaushik<sup>d\*</sup>

<sup>a</sup> Department of Chemistry and Centre of Advanced Studies in Chemistry, Panjab University Chandigarh, 160014, India

<sup>b</sup>Mads Clausen Institute, NanoSYD, University of Southern Denmark, Alsion 2, 6400, Sønderborg, Denmark

<sup>c</sup> Sophisticated Analytical Instrumentation Facility (SAIF)/CIL, Panjab University Chandigarh, 160014, India

<sup>d</sup>NanoBioTech Laboratory, Department of Natural Sciences, Division of Science, Arts & Mathematics, Florida Polytechnic University, Lakeland-33805, Florida, USA.

---

\*Corresponding authors:

[gurpreet14@pu.ac.in](mailto:gurpreet14@pu.ac.in) (G.K), [grc22@pu.ac.in](mailto:grc22@pu.ac.in) (GRC), [akaushik@floridapoly.edu](mailto:akaushik@floridapoly.edu) (AK)

#### Contents:

1. Optimization of amount of coating for fabrication of ZnO-Ag<sub>2</sub>O composite nanoflowers modified gold electrode.
2. Estimation of the electrode surface area

### 1. Optimization of amount of coating for fabrication of ZnO-Ag<sub>2</sub>O composite nanoflowers modified gold electrode

To optimize the amount of coating used for the fabrication of the modified gold electrode, DPV measurements in PBS with 20  $\mu$ M 2,4 DNT were performed using the electrode coated with different amount (1-7  $\mu$ L) of the nanoparticle slurry as shown in **Fig. 1S**. It was observed that when the coating amount was 5  $\mu$ L, maximum current response was obtained. Therefore, 5  $\mu$ L amount was fixed for fabrication of the modified electrode for further studies.

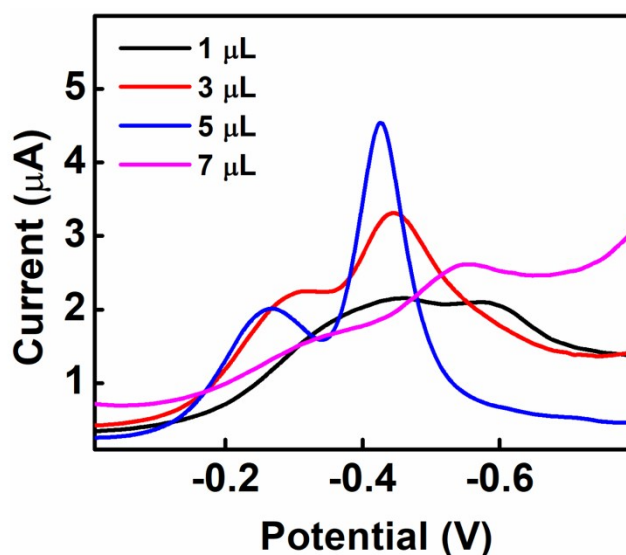

**Figure 1S.** DPV for 2,4-DNT (20  $\mu$ M in pH 7, 0.1 mM PBS) with different amount of coating (1 $\mu$ L-7 $\mu$ L).

## 2. Estimation of the electrode surface area

For estimation of the electrode surface area, scan rate studies were performed with solution of 0.1 mM potassium ferricyanide in 0.1 M KCl, and cyclic voltammograms were recorded for different scan rates (20-150 mVs<sup>-1</sup>) using the modified electrode. A plot of peak current ( $I_p$ ; in Amperes) vs. square root of scan rate ( $v^{1/2}$ ; in (V s<sup>-1</sup>)<sup>1/2</sup>) was plotted for the anodic peak current values as shown in **Fig. 2S** (a-b), and the value of the slope obtained was used in Randles-Sevcik equation at 25°C (S.1). The electrode surface area calculated was 0.033 cm<sup>2</sup>.

$$I_p = 2.69 \cdot 10^5 n^{3/2} A D^{1/2} C v^{1/2} \quad (\text{S.1})$$

where,  $I_p$  = peak current value in Amperes,  $n$  = number of electrons involved in the electrochemical process (1 for electrochemical oxidation/reduction of pot. ferricyanide),  $A$  = electrode area in cm<sup>2</sup>,  $D$  = diffusion coefficient in cm<sup>2</sup> s<sup>-1</sup>,  $C$  = concentration in mol cm<sup>-3</sup>,  $v$  = scan rate in V s<sup>-1</sup>.

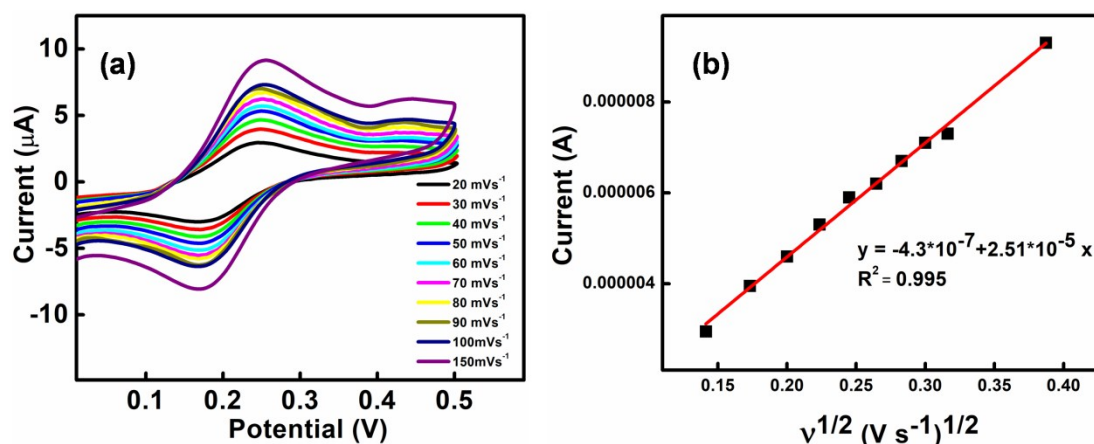

**Figure 2S** (a) CV for different scan rates (20-150 mVs<sup>-1</sup>) using the modified electrode in solution of 0.1 mM potassium ferricyanide in 0.1 M KCl (b) plot of peak current ( $I_p$ ; in Amperes) vs. square root of scan rate ( $v^{1/2}$ ; in (V s<sup>-1</sup>)<sup>1/2</sup>)
